# Supplementary material
Source: PubMed Central journal article supplement (PMC2900844)
Supplement: NIHMS131350-supplement-1.pdf [file NIHMS131350-supplement-1.pdf]

## **Supplemental Material**

# Supplemental Figure A

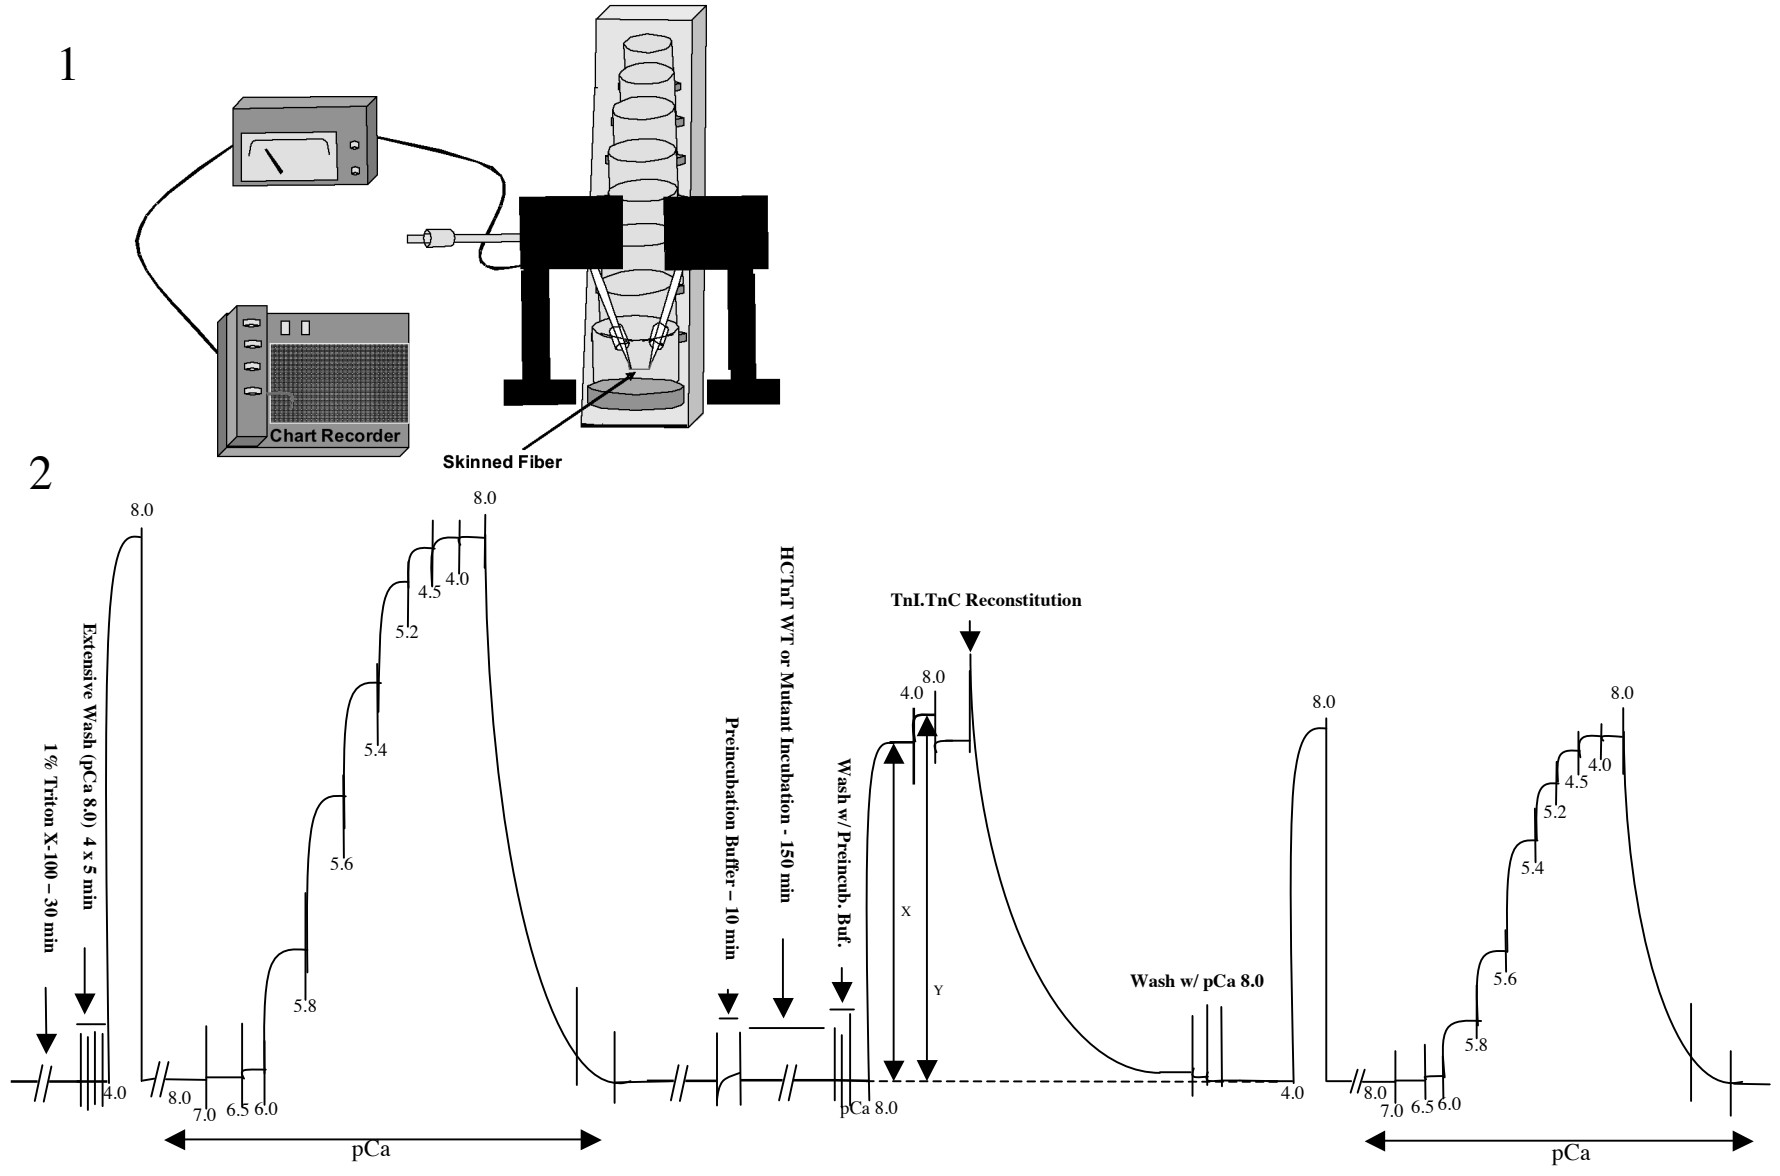

**Supplemental Figure A. Skinned fiber setup and experimental design.** 1) Schematic of the Güth system used for skinned fiber measurements. The skinned fiber with a diameter of 75 - 120  $\mu\text{m}$  and length of 1.0 - 1.2 mm is mounted between two clips, one side fixed and the other movable, to allow for changes in the fiber sarcomere length. The information such as increased or decreased tension in the fiber is captured by the force transducer. The signal is amplified and recorded by a chart recorder that allows evaluation of the changes in tension of the fiber as shown in the tracing in B. 2) Experimental design of skinned fibers used to assess contractile effects of wild type and DCM-troponin T mutants. First, the fiber is treated with Triton X-100 to remove the sarcolemma, thus disrupting the fibers internal  $\text{Ca}^{2+}$  storage. The Triton X-100 is washed away by subsequent washes with pCa 8 ( $10^{-8}$ )  $\text{Ca}^{2+}$  concentration, essentially a minus  $\text{Ca}^{2+}$  solution. Before the experiment is conducted, the ability of the fiber to contract is assessed by placing it in a high  $\text{Ca}^{2+}$  solution pCa 4 ( $10^{-4}$ )  $\text{Ca}^{2+}$  and then relaxed with pCa 8 solution. The endogenous pCa curve is performed by incubating the fiber in solutions of subsequently higher  $\text{Ca}^{2+}$  concentrations and calculating the pCa<sub>50</sub> and Hill coefficient using a Hill equation (see methods) which are the  $[\text{Ca}^{2+}]$  value at half maximal contraction and the cooperativity index of the thin filament activation, respectively. This establishes the pCa<sub>50</sub> value of the fiber with all native proteins intact. Next, the fiber is incubated for 2.5h with the experimental exogenous human cardiac troponin T (wild-type or mutant) and will displace native cardiac troponin complex. To check the efficiency of the endogenous cardiac troponin complex displacement the ratio between  $\text{Ca}^{2+}$  unregulated tension measured at pCa8 (X) and sum of  $\text{Ca}^{2+}$  unregulated force at low  $[\text{Ca}^{2+}]$  plus  $\text{Ca}^{2+}$  regulated force at high  $[\text{Ca}^{2+}]$  (Y) is evaluated (the percentage of displacement is reported in Table 3 for each protein). Because a certain amount of native cardiac troponin I and troponin C is lost during this procedure, the fiber is incubated with binary

exogenous human cardiac troponin I.C binary complex to replenish the regulatory units in the fiber and restore  $\text{Ca}^{2+}$  regulation of force in the fiber. The fiber is then rinsed with pCa8 to remove the excess exogenous human cardiac troponin I.C binary complex. Finally, a second pCa curve is performed by incubating the fiber in solutions of subsequently higher  $\text{Ca}^{2+}$  concentrations and from this data the pCa<sub>50</sub> and Hill coefficient are calculated. In addition, after the human cardiac troponin T displacement and reconstitution with binary complex the maximal force recovery was checked by briefly exposing the fibers to pCa 4.0. The percentage of maximal force recovery calculated in relation to the initial maximal force of the fiber is shown in Table 3.

**Supplemental Table A.**

**Dilated Cardiomyopathy Mutations**

| <b>Mutation Number</b> | <b>Mutation</b> | <b>Exon</b> | <b>References</b>  |
|------------------------|-----------------|-------------|--------------------|
| A                      | Arg134Gly       | 11          | Novel, this report |
| B                      | Arg151Cys       | 11          | Novel, this report |
| C                      | Arg159Gln       | 12          | Novel, this report |
| D                      | Arg205Trp       | 14          | [1], this report   |
| E, F, G, H             | Lys210del       | 14          | [1-4], this report |
| I                      | Glu244Asp       | 15          | [5-7], this report |
| J                      | Arg131Trp       | 11          | [1]                |
| K                      | Arg141Trp       | 11          | [4, 8, 9]          |
| L                      | Ala172Ser       | 12          | [10]               |
| M                      | Arg205Leu       | 14          | [1]                |
| N                      | Asp270Asn       | 16          | [1]                |

**Hypertrophic Cardiomyopathy Mutations**

| <b>Mutation Number</b> | <b>Mutation</b> | <b>Exon</b> | <b>References</b>                                                                                                                                                                                                               |
|------------------------|-----------------|-------------|---------------------------------------------------------------------------------------------------------------------------------------------------------------------------------------------------------------------------------|
| 1                      | Ser69Phe        | 8           | [11]                                                                                                                                                                                                                            |
| 2                      | Phe70Leu        | 9           | [12]                                                                                                                                                                                                                            |
| 3                      | Pro77Leu        | 9           | [11]                                                                                                                                                                                                                            |
| 4                      | Ile79Asn        | 9           | [5, 6, 11, 13, 14]                                                                                                                                                                                                              |
| 5                      | Glu83Lys        | 9           | [15]                                                                                                                                                                                                                            |
| 6                      | Val85Leu        | 9           | [16]                                                                                                                                                                                                                            |
| 7                      | Asp86Ala        | 9           | [17]                                                                                                                                                                                                                            |
| 8                      | Arg92Trp        | 10          | [11, 14, 16-23]                                                                                                                                                                                                                 |
| 9                      | Arg92Gln        | 10          | [5, 6, 13, 14, 24-30]                                                                                                                                                                                                           |
| 10                     | Arg92Leu        | 10          | [11, 12, 14, 31]                                                                                                                                                                                                                |
| 11                     | Arg94Leu        | 10          | [11, 14, 32]                                                                                                                                                                                                                    |
| 12                     | Arg94Cys        | 10          | [15]                                                                                                                                                                                                                            |
| 13                     | Lys97Asn        | 10          | Genomics of Cardiovascular Development, Adaptation, and Remodeling. NHLBI Program for Genomic Applications, Harvard Medical School. URL: <a href="http://www.cardiogenomics.org">http://www.cardiogenomics.org</a> [Oct, 2008]. |
| 14                     | Ala104Val       | 10          | [14, 26, 33, 34]                                                                                                                                                                                                                |
| 15                     | Phe110Ile       | 10          | [5, 6, 14, 16, 26, 35-37]                                                                                                                                                                                                       |
| 16                     | Phe110Leu       | 10          | [28]                                                                                                                                                                                                                            |
| 17                     | Phe110Val       | 10          | [12]                                                                                                                                                                                                                            |
| 18                     | Lys124Asn       | 10          | [38]                                                                                                                                                                                                                            |

|    |           |    |                                                                                                                                                                                                                                                                |
|----|-----------|----|----------------------------------------------------------------------------------------------------------------------------------------------------------------------------------------------------------------------------------------------------------------|
| 19 | Arg130Cys | 11 | [28, 39]                                                                                                                                                                                                                                                       |
| 20 | Glu160del | 12 | [5, 12, 14, 15, 28, 40]                                                                                                                                                                                                                                        |
| 21 | Glu163Lys | 12 | [5, 14]                                                                                                                                                                                                                                                        |
| 22 | Ser179Phe | 12 | [41]                                                                                                                                                                                                                                                           |
| 23 | Gln191del | 13 | [30]                                                                                                                                                                                                                                                           |
| 24 | Glu244Asp | 15 | [5-7]                                                                                                                                                                                                                                                          |
| 25 | Lys247Arg | 15 | [42]                                                                                                                                                                                                                                                           |
| 26 | Asn271Ile | 16 | [12]                                                                                                                                                                                                                                                           |
| 27 | Lys273Glu | 16 | [4, 16, 43]                                                                                                                                                                                                                                                    |
| 28 | Arg278Cys | 17 | [5, 6, 17, 28, 37, 42, 44-48]; Genomics of Cardiovascular Development, Adaptation, and Remodeling. NHLBI Program for Genomic Applications, Harvard Medical School. URL: <a href="http://www.cardiogenomics.org">http://www.cardiogenomics.org</a> [Oct, 2008]. |
| 29 | Arg278Pro | 17 | [17, 47, 49, 50]                                                                                                                                                                                                                                               |
| 30 | Arg286Cys | 17 | [12, 47]                                                                                                                                                                                                                                                       |
| 31 | Arg286His | 17 | [17, 30]                                                                                                                                                                                                                                                       |
| 32 | Trp287ter | 17 | [12]                                                                                                                                                                                                                                                           |

1. Mogensen, J., et al., *Severe disease expression of cardiac troponin C and T mutations in patients with idiopathic dilated cardiomyopathy*. J Am Coll Cardiol, 2004. **44**(10): p. 2033-40.
2. Kamisago, M., et al., *Mutations in sarcomere protein genes as a cause of dilated cardiomyopathy*. N Engl J Med, 2000. **343**(23): p. 1688-96.
3. Hanson, E.L., et al., *Cardiac troponin T lysine 210 deletion in a family with dilated cardiomyopathy*. J Card Fail, 2002. **8**(1): p. 28-32.
4. Venkatraman, G., et al., *Different functional properties of troponin T mutants that cause dilated cardiomyopathy*. J Biol Chem, 2003. **278**(43): p. 41670-6.
5. Watkins, H., et al., *Mutations in the genes for cardiac troponin T and alpha-tropomyosin in hypertrophic cardiomyopathy*. N Engl J Med, 1995. **332**(16): p. 1058-64.
6. Yanaga, F., S. Morimoto, and I. Ohtsuki, *Ca<sup>2+</sup> sensitization and potentiation of the maximum level of myofibrillar ATPase activity caused by mutations of troponin T found in familial hypertrophic cardiomyopathy*. J Biol Chem, 1999. **274**(13): p. 8806-12.
7. Nakaura, H., et al., *Effects of missense mutations Phe110Ile and Glu244Asp in human cardiac troponin T on force generation in skinned cardiac muscle fibers*. J Biochem, 1999. **126**(3): p. 457-60.
8. Li, D., et al., *Novel cardiac troponin T mutation as a cause of familial dilated cardiomyopathy*. Circulation, 2001. **104**(18): p. 2188-93.
9. Villard, E., et al., *Mutation screening in dilated cardiomyopathy: prominent role of the beta myosin heavy chain gene*. Eur Heart J, 2005. **26**(8): p. 794-803.
10. Stefanelli, C.B., et al., *Novel troponin T mutation in familial dilated cardiomyopathy with gender-dependant severity*. Mol Genet Metab, 2004. **83**(1-2): p. 188-96.
11. Varnava, A.M., et al., *Hypertrophic cardiomyopathy: histopathological features of sudden death in cardiac troponin T disease*. Circulation, 2001. **104**(12): p. 1380-4.

12. Richard, P., et al., *Hypertrophic cardiomyopathy: distribution of disease genes, spectrum of mutations, and implications for a molecular diagnosis strategy*. *Circulation*, 2003. **107**(17): p. 2227-32.
13. Thierfelder, L., et al., *Alpha-tropomyosin and cardiac troponin T mutations cause familial hypertrophic cardiomyopathy: a disease of the sarcomere*. *Cell*, 1994. **77**(5): p. 701-12.
14. Palm, T., et al., *Disease-causing mutations in cardiac troponin T: identification of a critical tropomyosin-binding region*. *Biophys J*, 2001. **81**(5): p. 2827-37.
15. Mogensen, J., et al., *Comparison of fluorescent SSCP and denaturing HPLC analysis with direct sequencing for mutation screening in hypertrophic cardiomyopathy*. *J Med Genet*, 2003. **40**(5): p. e59.
16. Konno, T., et al., *Phenotypic differences between electrocardiographic and echocardiographic determination of hypertrophic cardiomyopathy in genetically affected subjects*. *J Intern Med*, 2005. **258**(3): p. 216-24.
17. Van Driest, S.L., et al., *Prevalence and spectrum of thin filament mutations in an outpatient referral population with hypertrophic cardiomyopathy*. *Circulation*, 2003. **108**(4): p. 445-51.
18. Moolman, J.C., et al., *Sudden death due to troponin T mutations*. *J Am Coll Cardiol*, 1997. **29**(3): p. 549-55.
19. Moolman-Smook, J.C., et al., *The origins of hypertrophic cardiomyopathy-causing mutations in two South African subpopulations: a unique profile of both independent and founder events*. *Am J Hum Genet*, 1999. **65**(5): p. 1308-20.
20. Fujino, N., et al., *Cardiac troponin T Arg92Trp mutation and progression from hypertrophic to dilated cardiomyopathy*. *Clin Cardiol*, 2001. **24**(5): p. 397-402.
21. Waldmuller, S., et al., *Low-density DNA microarrays are versatile tools to screen for known mutations in hypertrophic cardiomyopathy*. *Hum Mutat*, 2002. **19**(5): p. 560-9.
22. Ackerman, M.J., et al., *Prevalence and age-dependence of malignant mutations in the beta-myosin heavy chain and troponin T genes in hypertrophic cardiomyopathy: a comprehensive outpatient perspective*. *J Am Coll Cardiol*, 2002. **39**(12): p. 2042-8.
23. Shimizu, M., et al., *Autopsy findings in siblings with hypertrophic cardiomyopathy caused by Arg92Trp mutation in the cardiac troponin T gene showing dilated cardiomyopathy-like features*. *Clin Cardiol*, 2003. **26**(11): p. 536-9.
24. Cuda, G., et al., *Co-existence of frataxin and cardiac troponin T gene mutations in a child with Friedreich Ataxia and familial hypertrophic cardiomyopathy*. *Hum Mutat*, 2002. **19**(3): p. 309-10.
25. Robinson, P., et al., *Alterations in thin filament regulation induced by a human cardiac troponin T mutant that causes dilated cardiomyopathy are distinct from those induced by troponin T mutants that cause hypertrophic cardiomyopathy*. *J Biol Chem*, 2002. **277**(43): p. 40710-6.
26. Hinkle, A. and L.S. Tobacman, *Folding and function of the troponin tail domain. Effects of cardiomyopathic troponin T mutations*. *J Biol Chem*, 2003. **278**(1): p. 506-13.
27. Javadpour, M.M., et al., *Decreased energetics in murine hearts bearing the R92Q mutation in cardiac troponin T*. *J Clin Invest*, 2003. **112**(5): p. 768-75.
28. Torricelli, F., et al., *Prevalence and clinical profile of troponin T mutations among patients with hypertrophic cardiomyopathy in tuscany*. *Am J Cardiol*, 2003. **92**(11): p. 1358-62.

29. Van Driest, S.L., et al., *Comprehensive analysis of the beta-myosin heavy chain gene in 389 unrelated patients with hypertrophic cardiomyopathy*. J Am Coll Cardiol, 2004. **44**(3): p. 602-10.
30. Van Driest, S.L., et al., *Myosin binding protein C mutations and compound heterozygosity in hypertrophic cardiomyopathy*. J Am Coll Cardiol, 2004. **44**(9): p. 1903-10.
31. Forissier, J.F., et al., *Codon 102 of the cardiac troponin T gene is a putative hot spot for mutations in familial hypertrophic cardiomyopathy*. Circulation, 1996. **94**(12): p. 3069-73.
32. Varnava, A., et al., *A new mutation of the cardiac troponin T gene causing familial hypertrophic cardiomyopathy without left ventricular hypertrophy*. Heart, 1999. **82**(5): p. 621-4.
33. Yamauchi-Takahara, K., et al., *Clinical implications of hypertrophic cardiomyopathy associated with mutations in the alpha-tropomyosin gene*. Heart, 1996. **76**(1): p. 63-5.
34. Nakajima-Taniguchi, C., et al., *Novel missense mutation in cardiac troponin T gene found in Japanese patient with hypertrophic cardiomyopathy*. J Mol Cell Cardiol, 1997. **29**(2): p. 839-43.
35. Anan, R., et al., *Patients with familial hypertrophic cardiomyopathy caused by a Phe110Ile missense mutation in the cardiac troponin T gene have variable cardiac morphologies and a favorable prognosis*. Circulation, 1998. **98**(5): p. 391-7.
36. Lin, T., et al., *Phenotypic variation of familial hypertrophic cardiomyopathy caused by the Phe(110)-->Ile mutation in cardiac troponin T*. Cardiology, 2000. **93**(3): p. 155-62.
37. Hernandez, O.M., et al., *F110I and R278C troponin T mutations that cause familial hypertrophic cardiomyopathy affect muscle contraction in transgenic mice and reconstituted human cardiac fibers*. J Biol Chem, 2005. **280**(44): p. 37183-94.
38. An, F.S., et al., *[A novel missense mutation, K124N, in the troponin T gene of Chinese populations with hypertrophic cardiomyopathy]*. Zhonghua Yi Xue Za Zhi, 2004. **84**(16): p. 1340-3.
39. Song, L., et al., *Mutations profile in Chinese patients with hypertrophic cardiomyopathy*. Clin Chim Acta, 2005. **351**(1-2): p. 209-16.
40. Capek, P. and J. Skvor, *Hypertrophic cardiomyopathy--molecular genetic analysis of exons 9 and 11 of the TNNT2 gene in Czech patients*. Methods Inf Med, 2006. **45**(2): p. 169-72.
41. Ho, C.Y., et al., *Homozygous mutation in cardiac troponin T: implications for hypertrophic cardiomyopathy*. Circulation, 2000. **102**(16): p. 1950-5.
42. Garcia-Castro, M., et al., *Hypertrophic cardiomyopathy: low frequency of mutations in the beta-myosin heavy chain (MYH7) and cardiac troponin T (TNNT2) genes among Spanish patients*. Clin Chem, 2003. **49**(8): p. 1279-85.
43. Fujino, N., et al., *A novel mutation Lys273Glu in the cardiac troponin T gene shows high degree of penetrance and transition from hypertrophic to dilated cardiomyopathy*. Am J Cardiol, 2002. **89**(1): p. 29-33.
44. Elliott, P.M., L. D'Cruz, and W.J. McKenna, *Late-onset hypertrophic cardiomyopathy caused by a mutation in the cardiac troponin T gene*. N Engl J Med, 1999. **341**(24): p. 1855-6.
45. Garcia-Castro, M., et al., *[Direct detection of malignant mutations in patients with hypertrophic cardiomyopathy]*. Rev Esp Cardiol, 2003. **56**(10): p. 1022-5.



46. Theopistou, A., et al., *Clinical features of hypertrophic cardiomyopathy caused by an Arg278Cys missense mutation in the cardiac troponin T gene*. Am J Cardiol, 2004. **94**(2): p. 246-9.
47. Miliou, A., et al., *Low prevalence of cardiac troponin T mutations in a Greek hypertrophic cardiomyopathy cohort*. Heart, 2005. **91**(7): p. 966-7.
48. Ingles, J., et al., *Compound and double mutations in patients with hypertrophic cardiomyopathy: implications for genetic testing and counselling*. J Med Genet, 2005. **42**(10): p. e59.
49. Erdmann, J., et al., *Mutation spectrum in a large cohort of unrelated consecutive patients with hypertrophic cardiomyopathy*. Clin Genet, 2003. **64**(4): p. 339-49.
50. Erdmann, J., et al., *A novel missense Arg 278 Pro mutation in the Troponin T gene (TNNT2)*. Human Mutation, 1998. **12**(5): p. 364.
